# 1 **High current optogenetic channels for stimulation and inhibition of** 2 **primary rat cortical neurons**

3 Lei Jin<sup>a</sup>, Eike Frank Joest<sup>b</sup>, Wenfang Li<sup>a</sup>, Shiqiang Gao<sup>b</sup>, Andreas Offenhäusser<sup>a</sup>, Vanessa  
4 Maybeck<sup>a</sup>

5 <sup>a</sup>Institute of Complex Systems ICS-8, Forschungszentrum Jülich, Leo-Brandt-Str., D-52428  
6 Jülich, Germany; <sup>b</sup>Department of Biology, Institute for Molecular Plant Physiology and  
7 Biophysics, Biocenter, Julius-Maximilians-University of Würzburg, Julius-von-Sachs-Platz 2, D-  
8 97082 Würzburg, Germany

## 9 **Abstract**

10 ChR2-XXL and GtACR1 are currently the cation and anion ends of the optogenetic single  
11 channel current range. These were used in primary rat cortical neurons *in vitro* to manipulate  
12 neuronal firing patterns. ChR2-XXL provides high cation currents via elevated light sensitivity  
13 and a prolonged open state. Stimulating ChR2-XXL expressing putative presynaptic neurons  
14 induced neurotransmission. Moreover, stable depolarisation block could be generated in single  
15 neurons using ChR2-XXL, proving that ChR2-XXL is a promising candidate for *in vivo*  
16 applications of optogenetics, for example to treat peripheral neuropathic pain. We also  
17 addressed an anion channelrhodopsin (GtACR1) for the next generation of optogenetic neuronal  
18 inhibition in primary rat cortical neurons. GtACR1's light-gated chloride conduction was verified  
19 in primary neurons and the efficient photoinhibition of action potentials, including spontaneous  
20 activity, was shown. Our data also implies that the chloride concentration in neurons decreases  
21 during neural development. In both cases, we find surprising applications of these high current  
22 channels. For ChR2-XXL inhibition and stimulation are possible, while for GtACR1 the role of Cl<sup>-</sup>  
23 during neural development becomes a new optogenetic target.

## 24 **Introduction**

25 The past discovery of Channelrhodopsin (ChR) 1/2<sup>1,2</sup> enabled a broad range of novel  
26 neurophysiological experiments using optogenetics<sup>3,4</sup>. The corresponding optogenetic  
27 applications are commonly limited by the functional expression in a particular model system or  
28 the rhodopsin's features, like distinct specificity for particular ions. To reach a high level of  
29 expression and the corresponding number of functionally produced rhodopsins, the  
30 supplementation of the chromophore all-trans-vitamin-a-aldehyde (retinal) has proved to be

31 helpful<sup>5</sup> and under some conditions the supplementation is even obligatory<sup>3</sup>. Recently a ChR2  
32 mutant called ChR2-XXL was published to overcome this limitation of optogenetics with strikingly  
33 high expression and slow closing kinetics enabling high photocurrents even under low light and  
34 retinal conditions<sup>6</sup>. Similar to its precursor, ChR2-XXL is a relatively unselective proton and  
35 cation channel enabling neuronal firing during illumination with blue light (**Fig. 1a**). The past  
36 optogenetic approaches to inhibit neuronal activity have been based on light-driven pumps and  
37 are thus less efficient. Recent studies describe the discovery of Anion Channelrhodopsins  
38 (ACRs)<sup>7</sup> as an alternative. Within this class, GtACR1 seems to have a relatively strict anion  
39 conductance and offers the possibility of efficient light gated neuronal silencing (**Fig. 1a**). ChR2-  
40 XXL already proved to be a powerful optogenetic tool in *Drosophila Melanogaster*. Here we  
41 further tested the two high current optogenetic channels (ChR2-XXL and GtACR1) in a  
42 mammalian system (primary rat cortical neurons) to propose what protocols are needed to  
43 control neural activity without any side effects on the cells. Both high ion current light-driven tools  
44 offer a next generation of neurophysiological optogenetics. Here we highlight consequent  
45 applications and set the field for advanced optogenetics.

46 Peripheral neuropathic pain originates in the peripheral nerve fibres, most commonly in the arms  
47 and legs<sup>8,9</sup>. Scientists of neural engineering are seeking improved approaches that can be used  
48 to block pain fibres selectively and reversibly to alleviate episodes of debilitating chronic pain. An  
49 optogenetic approach<sup>2,10,11</sup> offers elegant ways to achieve this aim. Especially, ChR2-XXL<sup>6</sup>,  
50 which can give rise to the largest photocurrents of all published ChRs and mutants with an  
51 increased light sensitivity more than 10,000-fold over wild-type ChR2 in *Drosophila* larvae. This  
52 results in gating by diffuse, ambient light and enables an efficient threshold surpassing  
53 depolarisation for non-invasive neuronal control. Moreover it is likely that a stable depolarisation  
54 block can be induced by photostimulating ChR2-XXL expressing neurons due to its large  
55 photocurrent<sup>12</sup>, inactivating the voltage-gated sodium channels<sup>13</sup>, or activation of calcium-  
56 activated K<sup>+</sup> channels, resulting in a block of neuronal over-excitation<sup>14</sup>.

57 Optogenetic studies of neurotransmission will play an important role in the fields of behaviour as  
58 well as neuronal disorders. Moreover, ChR2-XXL with its characteristic long open-state<sup>6</sup> likely  
59 allows future investigations of synaptic plasticity *in vivo*. Therefore, investigating  
60 neurotransmission by stimulating ChR2-XXL expressing cultured neurons will build a  
61 fundamental basis.

62 Channelrhodopsin-2 and variants thereof<sup>2</sup> were generated and characterised to become a  
63 toolbox for activating neural activity in response to light and are widely applied in neuroscience

64 <sup>3,4,15–17</sup>. In contrast, inhibitory tools are less frequent in the literature and unequally effective for  
65 inhibiting neurons. However, recently discovered naturally occurring anion channelrhodopsins  
66 (ACRs) of the alga *Guillardia theta* might overcome these limitations and imbalance <sup>7</sup> by  
67 exclusive anion conductance. ACRs seem to be able to silence neuronal activity with high  
68 sensitivity and efficiency, <sup>7</sup> presumably due to their strict conduction of anions such as Cl<sup>-</sup>.  
69 Complete exclusion of protons and cations, results in their effective hyperpolarisation of the  
70 neural membrane, and usefulness in decoding brain functions.

71 Here, we present possible applications of high ion current optogenetics by expressing ChR2-  
72 XXL or GtACR1 in primary rat cortical neurons. We introduced optogenetic investigations of  
73 neurotransmission with ChR2-XXL in primary rat cortical neurons and moreover we investigated  
74 whether a stable depolarisation block can be successfully induced in ChR2-XXL expressing  
75 neurons. Furthermore, the function of GtACR1 was validated in primary cortical neurons by  
76 successfully achieving photoinhibition of spiking induced by a pulsed current as well as inhibition  
77 of spontaneous activity. Our findings will strongly facilitate and broaden these tools to investigate  
78 how the inhibitory or excitatory neurons control the behaviour. Aside from the efficiency of ChR2-  
79 XXL and GtACR1 in standard applications, these additional uses show that there are more areas  
80 of optogenetics to be developed using high current channels. These two high current  
81 optogenetic channels (ChR2-XXL and GtACR1) will provide a sufficient toolbox for optical  
82 control to decode neural circuits and understand basic brain function <sup>18,19</sup>.

## 83 **Results**

### 84 **GtACR1 or ChR2-XXL in *Xenopus laevis* oocytes**

85 We validated GtACR1 by generating a GtACR1::YFP construct and injecting the cRNA into  
86 *Xenopus laevis* (*X.l.*) oocytes for TEVC recordings. High photocurrents were already detected 16  
87 hours post injection (hpi) of 5 ng/oocyte cRNA with saturating 530 nm light pulses (**Fig. 1b**).  
88 Surprisingly, no obvious YFP signal was observed by fluorescence microscopy at this time,  
89 indicating a low GtACR1 expression level and relatively high single channel conductance. ChR2-  
90 XXL's increased photocurrent is associated with a stronger expression level <sup>6,20</sup>. To further  
91 validate these observations, photocurrents and the fluorescence of oocytes expressing GtACR1  
92 or ChR2-XXL were measured at distinct time points after injection of corresponding cRNA.  
93 Photocurrents of GtACR1 reached about 30±3% at 18 hpi, 42±10% at 42 hpi of the maximum  
94 current recorded after the normal expression time of 66 hpi. In contrast, ChR2-XXL  
95 photocurrents were 5±1% at 18 hpi, 30±8% at 42 hpi and 47±7% at 66 hpi relative to the  
96 photocurrents observed in case of GtACR1 (**Fig. S 1a**). However, the fluorescence of oocytes

97 expressing ChR2-XXL was at least 2-times higher than of those expressing GtACR1 at all three  
98 time points though the amount of injected ChR2-XXL cRNA was four times higher (**Fig. S 1b, c**).  
99 This manifests that ChR2-XXL's single channel conductance is strongly reduced relative to  
100 GtACR1.

101 As for ChRs, the functional expression of GtACR1 should depend on retinal binding <sup>21</sup>. In  
102 *Xenopus laevis* oocytes, the GtACR1 photocurrent at 16 hpi was ~3 times higher in culture  
103 buffer supplemented with 1  $\mu$ M all-trans-retinal than without (**Fig. 1c**), which is similar to the  
104 change in current observed for ChR2-XXL<sup>6</sup>. Since GtACR1::YFP fluorescence was not obvious  
105 at 16 hpi, the YFP signal at 64 hpi was investigated but no obvious difference could be seen (**Fig.**  
106 **1d**), showing that the high single channel conductance produced a distinguishable photocurrent  
107 at such a low expression level that a difference in YFP signal is not detectable. Interestingly we  
108 also observed that the GtACR1 fluorescence accumulated at distinct spots (**Fig. S 2b**).

### 109 **Neurotransmission induced with ChR2-XXL**

110 To functionally validate the powerful optogenetic tool ChR2-XXL<sup>6</sup> in primary rat cortical neurons,  
111 the DNA of ChR2-XXL was delivered into neurons using electrofection on the day of preparation.  
112 Very clear YFP fluorescence was detected on DIV13 (**Fig. 2a**) indicating ChR2-XXL expression.  
113 Fluorescence was generally homogeneous over the soma and neurites indicating an even  
114 distribution of the channel.

115 High photocurrents and light sensitivity make possible easy monitoring of neurotransmission,  
116 therefore we applied ChR2-XXL in primary rat cortical neurons and customised a protocol for  
117 neurotransmission studies (**Fig. 2b**). For this, neurons exhibiting fluorescence were selected as  
118 putative presynaptic neurons. Neurons without fluorescence were assumed to be postsynaptic  
119 neurons. A ChR2-XXL-expressing neuron (the putative presynaptic neuron) was photostimulated,  
120 while a ChR2-XXL negative neuron (the putative postsynaptic neuron) was recorded using  
121 whole cell patch clamp. In order to laser stimulate with high-fidelity, the distance between the  
122 putative presynaptic and postsynaptic neurons was longer than 200  $\mu$ m but located in the same  
123 0.15 mm<sup>2</sup> frame of imaging. All measurements were done in the dark to avoid activation of  
124 ChR2-XXL by stray light. The principle is that neurotransmitter release from the ChR2-XXL  
125 positive presynaptic neuron under the blue light stimulus could elicit a detectable postsynaptic  
126 current (PSC) in the putative postsynaptic neuron. If excitatory, this can make the postsynaptic  
127 neuron surpass its threshold and fire action potentials.

128 Based on the above described protocol, inward currents were successfully evoked in putative  
129 postsynaptic neurons from DIV8 or DIV15 when illuminating the putative presynaptic neurons  
130 (ChR2-XXL positive) (**Fig. 2c**). Moreover, interestingly, a relatively high number of action  
131 potentials were recorded at the putative postsynaptic neurons (**Fig. 2d**), especially during long-  
132 duration photostimulation. Compared to laser stimulations of just 1 second, the postsynaptic  
133 spiking continued significantly longer when the laser stimulated for 60 seconds (**Fig. 2e**). These  
134 data indicate that neurotransmission could be shaped in primary rat cortical neurons using  
135 ChR2-XXL.

### 136 Depolarisation block induced by ChR2-XXL

137 Because ChR2-XXL could generate the largest photocurrents of all ChRs published, and  
138 showed light sensitivity more than 10,000-fold over wild-type ChR2 in *Drosophila* larvae<sup>6</sup>, we  
139 investigated whether ChR2-XXL could induce a stable depolarisation block when exposed to  
140 weak white light for a few minutes. In order to achieve depolarisation block, all neurons were  
141 illuminated 10 minutes with weak white light (<8.5 nW/mm<sup>2</sup> from a xenon bulb). Subsequently,  
142 patch clamp recordings were made. After white light exposure, ChR2-XXL positive neurons  
143 needed more injected current than control neurons to hold the membrane potential at -70 mV  
144 regardless of DIV (**Fig. 3a**). The reason for this should be a change in the resting potential of  
145 these ChR2-XXL positive neurons caused by the continued currents through ChR2-XXL. Next,  
146 we measured the resting potential using patch clamp in current-clamp mode, with no current  
147 applied. The resting potentials of most of ChR2-XXL positive neurons were higher than those of  
148 control cells across different culture days (DIV7 to DIV14) (**Fig. 3b**). From our recordings with  
149 primary rat cortical neurons, a depolarisation to about -50 mV evoked an action potential during  
150 electrical stimulation. However, most of the ChR2-XXL positive neurons surpassed this threshold  
151 after exposure to dim white light (**Fig. 3b**). Depolarisation block drives the membrane potential  
152 over threshold and holds it there.

153 Subsequently we investigated whether the membrane potential could be depolarised in ChR2-  
154 XXL positive neurons by laser stimulation after a depolarisation block. Together with a laser  
155 stimulus, patch clamp was employed to characterise ChR2-XXL positive cortical neurons. All  
156 representative voltage traces indicated two kinds of patterns (**Fig. 3c**). The first pattern showed  
157 a declining membrane potential prior to laser stimulation due to exposure to the room lighting  
158 while setting up the experiment, which demonstrated ChR2-XXL had been activated but was  
159 gradually closing. This is consistent with ChR2-XXL's long open state and high light sensitivity<sup>6</sup>.  
160 The second pattern was that depolarisation took place without action potentials during laser

161 stimulation of ChR2-XXL-expressing neurons, indicating that the voltage-gated channels were  
162 still inactivated. Moreover, prolonged laser stimulation failed to elicit action potentials. These  
163 data demonstrated that ChR2-XXL can be used to induce a stable state of depolarisation block.

164 A depolarisation block forces neurons into a refractory state without the ability to produce action  
165 potentials due to inactive voltage-gated sodium channels<sup>13</sup>. Therefore, we designed an  
166 approach using voltage clamp to measure how voltage-gated inward current was changed and  
167 confirmed that it could be recovered in ChR2-XXL positive neurons after neurons were blocked.  
168 To recover blocked neurons (**Fig. 3d**), voltage was stepped from -70 mV to -20 mV by +10 mV  
169 steps each held for 20 msec. Then a hyperpolarisation pulse was applied and those steps  
170 repeated. Different hyperpolarisations were tested as in Bendahhou<sup>22</sup>. No inward current was  
171 detected before or after hyperpolarisation at -130 mV for 5 secs in ChR2-XXL positive neurons,  
172 whereas the amplitude of voltage-gated inward current was slightly increased after  
173 hyperpolarisation in a control neuron (**Fig. 3e**). These data indicated that hyperpolarisation can  
174 un-block a control neuron, but those particular conditions were not sufficient for un-blocking the  
175 ChR2-XXL expressing neuron. Therefore we further decreased the hyperpolarizing pulse for  
176 ChR2-XXL positive neurons. Finally, at -170 mV for 2 secs or -210 mV for 2 secs, a current  
177 recovery was seen, whereas it never appeared at -150 mV for 2 secs (**Fig. 3f**). Moreover,  
178 compared with the hyperpolarisation at -170 mV for 2 secs, voltage-gated current was slightly  
179 increased after hyperpolarisation at -210 mV, but it was still lower than the voltage-gated current  
180 in the control neurons. These data indicated that depolarisation block could be successfully  
181 induced using ChR2-XXL and that it could be recovered by hyperpolarisation to -170 mV or -210  
182 mV for 2 secs.

### 183 **Light-gated chloride conduction by GtACR1 during neural development**

184 Having successfully induced neurotransmission and a depolarisation block in primary rat cortical  
185 neurons using a depolarizing tool, we aimed to apply the high current, light-gated, anion channel  
186 GtACR1 to silence neuronal activity by hyperpolarisation. Light-gated proton pumps<sup>23</sup> or  
187 modified ChRs with additional chloride conductance<sup>24-27</sup> are rather inefficient compared to  
188 optogenetic channels. GtACR1-YFP DNA was transfected into primary rat cortical neurons by  
189 electrofection before seeding cells on PDL-coated coverslips. Very clear yellow fluorescence  
190 was detected in the neurons transfected with GtACR1 on DIV16 (**Fig. 4a**). However,  
191 fluorescence was intermittent along the neural membrane including the membrane of axons or  
192 dendrites. These data indicated GtACR1 expression in the membrane of neurons.



193 Next, the function of GtACR1 was investigated by electrophysiology and light induced opening.  
194 GtACR1 can be activated with a saturating blue light pulse (**Fig. S 2a**), so here blue laser was  
195 employed to investigate GtACR1 in primary cortical neurons. The membrane of cortical neurons  
196 was hyperpolarised by blue laser stimulation for 0.25 milliseconds (**Fig. S 4a**), hyperpolarisation  
197 was induced by GtACR1 with a mean rise time ( $\tau_R$ ) of  $1.23 \pm 0.14$  milliseconds and a mean  
198 decay time ( $\tau_D$ ) of  $126.03 \pm 19.43$  milliseconds (**Fig. S 4b**). This is similar to slow switching  
199 components observed in GtACR1 by Sineschchekov et al [33]. Voltage step sequences applied  
200 during and 1.5 s after illumination exhibited lower currents at each holding potential. Moreover,  
201 voltage-gated peak current was eliminated by laser stimulation (see: inset in **Fig. S 5a**). At early  
202 stages of neuronal development (DIV6 and DIV8), the IE relationship showed a linear  
203 relationship (**Fig. 4b**). However, at later, more mature states of neurons (DIV14, DIV17 and  
204 DIV20) a rectification appeared. Therefore, we investigated whether the synaptic inputs in the  
205 mature neural network resulted in this rectification. The later mature state of neurons (DIV14,  
206 DIV16 and DIV20) still showed similar rectification behaviour on stationary photocurrents (**Fig. S**  
207 **6**). Therefore, the rectification was not associated with synaptic inputs in the neuronal network.  
208 Next, we compared the voltage-dependent currents during photostimulation and dark-periods.  
209 Currents during photostimulation fit to a linear shape (**Fig. 4c** and **Fig. S 5c**), whereas these  
210 currents under dark showed a rectification behaviour (**Fig. S 5b** and **d**), which contributed to the  
211 age-dependent rectification behaviour of the stationary photocurrent (**Fig. 4b**). In a word, the  
212 change in rectification is not associated with the GtACR1 channels, but the state of the neurons  
213 in which they are expressed.

214 Furthermore, the reversal potential for GtACR1 during neural development (from DIV6 to DIV20)  
215 showed two kinds of trends (**Fig. 4d**). For younger neurons from DIV6 to DIV8, the reversal  
216 potential declined from  $-66.4 \text{ mV} \pm 3.4 \text{ mV}$  to  $-72.2 \text{ mV} \pm 2.1 \text{ mV}$ . The reversal potential was  
217 then steady through DIV17 at about  $-72 \text{ mV}$  ( $p = 0.958$  for comparisons of DIV8 to DIV14 and  $p$   
218  $= 0.8417$  for DIV8 to DIV17). Then at DIV20, it further declined to  $-78.4 \text{ mV} \pm 1.6 \text{ mV}$  ( $p = 0.032$ ,  
219 DIV17 vs. DIV20). These data imply the chloride concentration in neurons was changing during  
220 neural development.

### 221 **Photoinhibition of spiking by GtACR1**

222 Having successfully validated the light-gated chloride conductivity of GtACR1 in primary rat  
223 cortical neurons, we investigated how GtACR1 mediated neuronal membrane potential  
224 alterations. First, we addressed photoinhibition of spiking induced by pulsed currents. To induce  
225 spiking, 10 millisecond long 300 pA depolarizing electric pulses were applied at 20 Hz to primary

226 rat cortical neurons expressing GtACR1 via the patch clamp pipette in whole cell mode. For a  
227 typical GtACR1-expressing neuron on DIV8, illumination successfully inhibited induced neuronal  
228 spiking compared to current injections performed in the dark (black trace vs. green trace, see:  
229 **Fig. 5a**). Also, the same results were obtained at DIV14 (**Fig. 5b**) when neurons are embedded  
230 in a neural network and should also be receiving synaptic inputs. Because the chloride  
231 concentration in neurons was different during neural development (**Fig. 4d**), we wanted to verify  
232 whether GtACR1 could inhibit neural activity at different culture days. Therefore we tested 4-7  
233 neurons at each different culture day (from DIV6 to DIV20). Interestingly, all spikings induced by  
234 pulsed current were successfully inhibited by light, regardless of the neuronal age and  
235 corresponding chloride concentrations. These data indicate that the large currents generated by  
236 GtACR1 overcome neural stimulation even when chloride concentration reduces flow through  
237 the channel.

238 Subsequently, we further addressed spontaneous neural activity in mature networks. Neurons  
239 expressing GtACR1 at DIV 20 were selected for whole cell patch clamp recordings. In response  
240 to photostimulation, spontaneous activity of all neurons measured ( $n=10$  neurons expressing  
241 GtACR1 from DIV20) was successfully inhibited (**Fig. S 7**). Furthermore, spontaneous activity  
242 was repeatedly suppressed with intervening return to spontaneous firing in the dark (**Fig. 5d**).  
243 These data demonstrate GtACR1 could effectively and reversibly inhibit spontaneous neural  
244 activity by illumination.

245 Furthermore, whether hyperpolarisation induced by GtACR1 affects the spiking after illumination  
246 is still unknown. In order to address this open gap, during the recordings of GtACR1-expressing  
247 neurons a continuous depolarizing injection of 100 pA was applied to generate continuous action  
248 potentials. Simultaneously, laser pulses were applied to induce hyperpolarisation. The amplitude  
249 of action potentials after light illumination was slightly increased (**Fig. 5c**). Demonstrating that  
250 the hyperpolarisation by GtACR1 could recover the voltage-gated channels in neurons, resulting  
251 in increasing the action potential's amplitude (**Fig. 5c**).

252 However, by multiple illuminations, the frequency of action potentials showed a decreasing  
253 phenomenon. This may be due to after turning off the light inhibition the cells rebound and fire  
254 too much, and too much firing triggers more slow calcium activated outward  $K^+$  currents as a  
255 response to over-excitation<sup>14,28</sup>. Also, we tested whether the amplitude of hyperpolarisation by  
256 GtACR1 is changed after multiple activations. The photocurrent evoked by the laser pulse  
257 decreased to 75% after ~ 10 pulses (**Fig. S 8a and b**). Neural membrane potential was



258 hyperpolarised by multiple light pulses (**Fig. S 8c and d**) and interestingly, the hyperpolarisation  
259 amplitude decreased following multiple pulses due to GtACR1's desensitisation property.

## 260 Discussion

261 The high photocurrents of GtACR1 and ChR2-XXL that have been shown here and previously in  
262 X.l. oocytes is attributable to different mechanisms. High currents reached for GtACR1 with low  
263 cRNA injection and expression levels below the fluorescence detection limit suggest higher  
264 single channel conductance. Whereas, ChR2-XXL reached high currents by producing twice as  
265 many channels, according to fluorescent tag intensity. The rapid establishment of detectable  
266 GtACR1 currents in X.l. oocytes provides a platform for the further study of GtACR1 by site-  
267 directed mutagenesis. The aim of these efforts will be to generate mutants with faster kinetics  
268 and a red-shifted absorption spectrum.

269 ChR2-XXL activation was used to control non-expressing putative postsynaptic cells.  
270 Interestingly, the spiking of putative postsynaptic neurons persisted after the end of a stimulus  
271 (**Fig. 2e**) with a slow decline. This phenomenon reflected the long open-state of ChR2-XXL. In  
272 addition, the amplitude of action potentials declined during the illumination (**Fig. 2d**). After laser  
273 illumination and a short dark period, the amplitude of action potentials increased to the initial size  
274 observed during spontaneous activity. This phenomenon implies that synaptic inputs elicited by  
275 the large and sustained photocurrent of ChR2-XXL, had blocked the recovery of some sodium  
276 channels from inactivation, resulting in reduced action potentials. Furthermore, the spiking in  
277 these postsynaptic neurons showed an oscillating decline (**Fig. S 3**). We hypothesise that the  
278 observed oscillating decline is associated with ChR2-XXL inducing rhythmic patterns of calcium  
279 influx in the presynaptic neurons, which can trigger exocytosis of neurotransmitter-containing  
280 synaptic vesicles via mechanisms shown previously<sup>29</sup>. The photocurrent of ChR2-XXL shows a  
281 prolonged decay<sup>6</sup>, which is presumably responsible for the decline of the spike rate.

282 With sustained current injection, neurons eventually enter a depolarisation block, which can  
283 protect them from excessive spiking activity<sup>30</sup>. Here, we have shown that ChR2-XXL can be  
284 used to induce a depolarisation block (**Fig. 3c**) by exposing the neurons to a halogen lamp's  
285 white light for 10 minutes. After this, all voltage traces (**Fig. 3c**) showed a decreased potential in  
286 advance of the first laser photostimulation, indicating that ChR2-XXL channels were still not  
287 completely closed. White light with low intensity is able to keep ChR2-XXL channels open,  
288 resulting sustained depolarization. After 10 minutes exposure to white light, our results showed  
289 that photostimulation failed to provoke action potentials (see: **Fig. 3c**). These data suggest that  
290 because the peak current and sensitivity are so high, even using the tail of the absorption

291 spectrum, it may be possible to manipulate ChR2-XXL with longer wavelength light that is more  
292 favoured for *in vivo* applications. Moreover, it was difficult to recover this state by  
293 hyperpolarisation at lower holding voltages. The need for at least -170 mV hyperpolarisation to  
294 re-set voltage gated channels suggests most natural processes would fail to overcome  
295 manipulation by ChR2-XXL. Our results support ChR2-XXL as a potential tool to block highly  
296 excitable neurons, as seen in some disorders like peripheral neuropathic pain.

297 To block neural firing by the more classical approach of hyperpolarization GtACR1 was  
298 expressed in primary cortical neurons. Contrary to the expectation that older neurons would  
299 have produced more protein and therefore have higher photoinduced currents, the response at  
300 DIV8 was similar to DIV17 or DIV20 (**Fig. 4c**). It may be that the CMV promoter is only stable in  
301 neurons of particular types<sup>33</sup>, independent of the transgene, since during neuronal development  
302 GtACR1 shows normalised currents with light that are not significantly different (**Fig. S 5c**). The  
303 recombinant Adeno-Associated Virus 6 (rAAV6) with hSyn promoter system would eliminate this  
304 issue in primary rat cortical neurons by utilizing a continually active neuron-specific promoter.  
305 The use of rAAVs would furthermore increase the percent of neurons expressing GtACR1<sup>34</sup>.  
306 Another factor influencing the current over time may be the ECl changes that have been shown  
307 to occur in the developing rodent brain<sup>35</sup>. Figure 4d implies chloride concentration was  
308 decreasing during neural development, consistent with other studies<sup>35,36</sup>. It may therefore be  
309 possible to use GtACR1 to manipulate chloride concentration during cell maturation to further  
310 study these processes.

## 311 **Methods**

### 312 **Molecular biology**

313 The ChR2-XXL-YFP fragment was amplified through Polymerase Chain Reaction with Phusion  
314 High-Fidelity DNA Polymerase (2 U/ $\mu$ L, # F-530S, Thermo Scientific, Germany) based on the  
315 plasmid named pGEM ChR2-XXL-YFP. Primer pairs for its amplification are listed below (**Table**  
316 **1**). For ChR2-XXL subcloning, the psc-hSyn-ChR2-XXL was generated using restriction digest-  
317 based strategies<sup>37</sup>, with the backbone produced from psc-hSyn-ChR2opt<sup>17</sup> using double-digest  
318 with *Hind* III and *Bam* HI.

| Name        | Sequence                                                         | Remark                                                             |
|-------------|------------------------------------------------------------------|--------------------------------------------------------------------|
| XXL-Forward | 5'- CCC <b>AAGCTT GCC ACC</b> ATG GAT TAT<br>GGA GGC GCC CTG AGT | 5' Enzyme site: <b>Hind III</b><br>Kozak sequence( <b>GCCACC</b> ) |
| XXL-Reverse | 5'- CG <b>GGATCC</b> T TAC TTG CCG GCG                           | 3' Enzyme site: <b>Bam HI</b>                                      |

GCC GCT TTA CTT GT

---

319 **Table 1** Primer pair for amplification of ChR2-XXL-YFP

320 5' Enzyme site is marked in red colour, 3' Enzyme site is marked in blue colour. Kozak sequence  
321 <sup>38</sup> improving efficient initiation of translation is marked in black colour with bold font.

322 The GtACR1 sequence was synthesised by GeneArt Strings DNA Fragments (Life technologies,  
323 Thermo Fisher Scientific) according to the publication <sup>7</sup>, while the codon usage was optimised to  
324 *Drosophila Melanogaster*. For *Xenopus* oocyte expression, the GtACR1 DNA was inserted into  
325 the pGEMHE vector within N-terminal BamHI and C-terminal XhoI restriction sites; a YFP tag  
326 was fused after the XhoI restriction site. For cortical neuron expression, the GtACR1-YFP  
327 sequence was cut from pGEMHE-GtACR-YFP and inserted into the PBK CMV vector using N  
328 terminal BamHI and C terminal HindIII restriction sites. The constructs were then confirmed by  
329 sequencing (GATC, Konstanz).

### 330 **Maxi preparation of Plasmids**

331 A single colony was picked from a freshly streaked selective plate and used to inoculate a starter  
332 culture of 5 ml LB medium containing the antibiotic Ampicillin (50 µg/mL). The starter culture was  
333 incubated for approx. 8 h at 37°C with vigorous shaking (approx. 225 rpm). 200 ml (pBK-CMV-  
334 GtACR1-YFP) or 500 ml (psc-hSyn-ChR2-XXL due to its low-copy) medium were inoculated with  
335 250–500 µl of starter culture. Then cultures were grown at 37°C for 12–16 h with vigorous  
336 shaking (approx. 225 rpm). To purify plasmids for electroporation, EndoFree Plasmid Maxi Kit  
337 (#12362 Qiagen, Germany) was used following the protocol the kit provided. In the last step, the  
338 DNA was dissolved in 200 µL of TE buffer. To determine the yield, DNA concentration was  
339 determined by both the microvolume UV-Vis spectrophotometry (NanoDrop 1000, Thermo  
340 Fisher Scientific, MA, USA) at 260 nm and quantitative analysis on an agarose gel after  
341 electrophoresis.

### 342 **Primary Rat Cortical Neuron culture and Electroporation**

343 Primary cortical cultures were prepared as described previously <sup>39</sup>. Briefly, cortices from  
344 embryonic day 18 (E18) Wistar rat brains were dissected and mechanically dissociated by  
345 trituration with a fire-polished, silanized pasteur pipette in 1 ml Hank's balanced salt solution  
346 without calcium or magnesium (HBSS-) (0.035% sodium bicarbonate, 1 mM pyruvate, 10 mM  
347 HEPES, 20 mM glucose, pH 7.4). The cell suspension was diluted 1:2 in HBSS+ (with calcium  
348 and magnesium) and non-dispersed tissue was allowed to settle for 3 min. The supernatant was

349 centrifuged for 2 min at 200 g. Amaxa Rat Neuron Nucleofector® Kit (Cat.No. VPG-1003) from  
350 Lonza Cologne GmbH (Germany) was used to transfer circular, double stranded, plasmid DNA  
351 directly into cells. Each electrofection experiment used two fresh cortices, dissociated and  
352 collected as described above. After centrifugation for 2 min at 200 g, the cell pellet was carefully  
353 resuspended in 200 µl room temperature Nucleofector® Solution from the Kit (163.6 µl of Rat  
354 Neuron Nucleofector® Solution mixed with 36.4 µl of Supplement), to which was added 6 µg of  
355 psc-hSyn-ChR2-XXL plasmid or 8.5 µg pBK-CMV-GtACR1-TYE plasmid. The cell/DNA  
356 suspension was quickly transferred into a certified cuvette without producing bubbles. Using the  
357 Nucleofector® Device (AAD-1001S, Lonza, Germany), program G-013 was applied to the cells.  
358 800 µl of the pre-equilibrated RPMI medium (Gibco, Grand Island, NY, USA) with 1% FBS  
359 (Gibco, Grand Island, NY, USA) and 0.5 mM L-glutamine (Gibco, Paisley, UK) were immediately  
360 added to the cuvette. The cells were counted in a Neubauer counting chamber and plated in a  
361 concentration of 50,000 cells per well (24-well-plate) on poly-D-lysine (PDL, 10 µg/ml) coated,  
362 12 mm diameter coverslips in 500 µl supplemented RPMI medium per well. After 4 hours, the  
363 medium was carefully replaced with 500 µl fresh supplemented Neurobasal medium (NB) per  
364 well to remove cellular debris (supplemented Neurobasal medium (Gibco, Paisley, UK) with 1%  
365 B-27 (Gibco, Grand Island, NY, USA), 0.5 mM L-glutamine (Gibco, Paisley, UK) and 50 µg/ml  
366 gentamicin (Sigma, Steinheim, Germany)). Cells were kept at 37°C, 5% CO<sub>2</sub> and 100% humidity  
367 in 500 µl NB. Every third day, half of the medium was exchanged.

368 This work except for GtACR1 experiments was carried out with the approval of the  
369 Landesumweltamt für Natur, Umwelt und Verbraucherschutz Nordrhein-Westfalen,  
370 Recklinghausen, Germany, in accordance with §6 TierschG., §4 TSchG i.V. and §2 TierSchVerV.  
371 GtACR1 experiments were carried out with the approval of the Landesumweltamt für Natur,  
372 Umwelt und Verbraucherschutz Nordrhein-Westfalen, Recklinghausen, Germany, number 84-  
373 02.04.2015.A173.

#### 374 **Fluorescence Microscopy and quantification of homogenised oocytes**

375 To qualitatively monitor the expression of YFP-tagged ionotropic photoreceptors conventional  
376 fluorescence microscopy was used. The YFP fluorescence of oocytes was detected by Leica  
377 DMI8. Bright field settings for the inverted microscope were always 100 ms exposure and gain  
378 1.5. Corresponding settings for detection of YFP fluorescence were always 1600 ms exposure  
379 and gain 1.8.

380 To quantify the fluorescence intensity, *Xenopus* oocytes expressing the indicated constructs  
381 were homogenised by pipetting and the resulting lysate was loaded into Nunc surface 96-well

382 plates and investigated using a corresponding fluorometer. The fluorescence emission was then  
383 measured at 538 nm by a Fluoroskan Ascent microplate fluorometer with 485 nm excitation.

### 384 **Oocyte electrophysiology**

385 cRNA was generated with the AmpliCap-MaxT7 High Yield Message Maker Kit (Epicentre  
386 Biotechnologies) using NheI-linearised pGEM-HE GtACR1 YFP plasmid. Oocytes were injected  
387 with the indicated amount of cRNA and incubated in ND96 solution (96 mM NaCl, 2 mM KCl, 1  
388 mM MgCl<sub>2</sub>, 1 mM CaCl<sub>2</sub>, 10 mM HEPES and 50 µg/ml Gentamycin, pH 7.4) containing 1 µM  
389 ATR. Ringer's solution (110 mM NaCl, 5mM KCl, 2 mM BaCl<sub>2</sub>, 1 mM MgCl<sub>2</sub>, 5 mM HEPES, pH  
390 7.6) was used as standard buffer for Two electrode voltage-clamp recordings with the indicated  
391 holding potential. 2s 473 nm blue laser and 530 nm green laser saturating light pulses were  
392 used for illumination.

### 393 **Neuron electrophysiology**

394 Whole cell patch clamp experiments were performed using an EPC9 amplifier (HEKA Elektronik,  
395 Lambrecht/Pfalz, Germany) controlled by the TIDA 5.05 software (HEKA Elektronik). The  
396 recordings were performed in extracellular patch clamp buffer solution (mM: NaCl 120, KCl 3,  
397 MgCl<sub>2</sub> 1, HEPES 10, CaCl<sub>2</sub> 2; pH 7.3). For the synaptic input blocking measurements, the  
398 following (all from Tocris Bioscience, Bristol, UK) were added to the extracellular solution above:  
399 D-AP5 (25 µM), NBQX (10 µM), SR 95531 hydrobromide (alternative name: Gabazine, 20 µM).  
400 Patch pipettes were pulled from borosilicate glass capillaries (Sutter Instrument Co., Novato, CA,  
401 USA) using a micropipette puller (P-2000, Sutter) to achieve a pipette resistance of 6-9 MOhm.  
402 For ChR2-XXL measurements the pipettes were filled with intracellular patch solution (mM: NaCl  
403 2, KCl 120, MgCl<sub>2</sub> 4, HEPES 5, EGTA 0.2, Mg-ATP 0.20, pH 7.3). For GtACR1 measurements,  
404 an intracellular solution with low chloride concentration (mM: K<sub>2</sub>SO<sub>4</sub> 67.5, MgCl<sub>2</sub> 2, adjusted to  
405 248 mosm/kg with glucose) was used.

### 406 **Laser stimulation**

407 Optogenetic channel expressing neurons were stimulated with a 473 nm diode laser (Rapp  
408 OptoElectronic GmbH, Hamburg, Germany), which was guided through an optical fibre and  
409 reflected with a dichroic mirror (UGA-40, Rapp OptoElectronic GmbH) into the light path of a  
410 Zeiss Axioscope microscope equipped with a x20 water immersion objective (Olympus,  
411 UMPLFLN20xW). Different delay times (500 msec to 60 sec) and different laser pulse times  
412 (ranging from 0.25 msec to 100 sec) were applied for light stimulation. Light intensity was 1.68  
413 W/mm<sup>2</sup> for ChR2-XXL stimulation (laser spot diameter was about 24 µm); GtACR1 can also be

414 activated with a saturating blue light pulse (**Fig. S 2a**), light intensity was 0.21 W/mm<sup>2</sup> for  
415 GtACR1 (laser spot diameter was about 61.2 μm).

## 416 **Data analysis**

417 Data were analysed in TIDA 5.240, Excel, Matlab, or Origin 9. The data are given as mean ±  
418 standard error of the mean (neurons) or s.d. (oocytes). For ChR2-XXL data, the spikes whose  
419 amplitudes were more than 35 mV were selected to determine the oscillation of firing frequency.  
420 Each frequency point was the average value of 5 seconds window. For GtACR1 measurements,  
421 stationary photocurrents of GtACR1 were measured for the last 50 ms of the illumination period,  
422 and then were corrected by subtraction of the current values from the last 50 milliseconds  
423 without light to adjust the baseline to zero. Reversal potentials were calculated by linear fit  
424 between a measured positive and a measured negative stationary current to extract the I=0 pA  
425 crossing point (here between two data points at voltage step of -60 mV or -80 mV and -70 mV).

## 426 **Data Availability**

427 The datasets generated during and/or analysed during the current study are available from the  
428 corresponding author on reasonable request.

## 429 **Acknowledgements**

430 The authors would like to thank B. Breuer for preparation of primary neurons.

## 431 **Conflict of Interest**

432 The authors declare no conflicts of interest.

## 433 **Author Contributions**

434 Conceptualisation: LJ, SG, AO. Data collection: LJ, EFJ, SG, WL. Data curation: SG, AO.  
435 Formal analysis: LJ, EFJ, SG, VM. Supervision: SG, VM, AO. Visualisation: LJ, EFJ, VM, SG,  
436 AO. All authors have contributed to and read the final version of the manuscript.

## 437 **References**

- 438 1. Nagel, G. *et al.* Channelrhodopsin-1: a light-gated proton channel in green algae. *Science*  
439 **296**, 2395–8 (2002).
- 440 2. Nagel, G. *et al.* Channelrhodopsin-2, a directly light-gated cation-selective membrane  
441 channel. *Proc. Natl. Acad. Sci.* **100**, 13940–13945 (2003).
- 442 3. Nagel, G. *et al.* Light activation of channelrhodopsin-2 in excitable cells of *Caenorhabditis*  
443 *elegans* triggers rapid behavioral responses. *Curr. Biol.* **15**, 2279–84 (2005).



- 444 4. Boyden, E. S., Zhang, F., Bamberg, E., Nagel, G. & Deisseroth, K. Millisecond-timescale,  
445 genetically targeted optical control of neural activity. *Nat. Neurosci.* **8**, 1263–8 (2005).
- 446 5. Yu, J., Chen, K., Lucero, R. V, Ambrosi, C. M. & Entcheva, E. Cardiac Optogenetics:  
447 Enhancement by All-trans-Retinal. *Sci. Rep.* **5**, 16542 (2015).
- 448 6. Dawydow, A. *et al.* Channelrhodopsin-2-XXL, a powerful optogenetic tool for low-light  
449 applications. *Proc. Natl. Acad. Sci.* 2–7 (2014). doi:10.1073/pnas.1408269111
- 450 7. Govorunova, E. G., Sineshchekov, O. A., Janz, R., Liu, X. & Spudich, J. L. Natural light-  
451 gated anion channels: A family of microbial rhodopsins for advanced optogenetics. *Sci.*  
452 **349**, 647–650 (2015).
- 453 8. Slavin, K. Peripheral nerve stimulation for neuropathic pain. *Neurotherapeutics* **5**, 100–  
454 106 (2008).
- 455 9. Torrance, N., Smith, B. H., Bennett, M. I. & Lee, A. J. The Epidemiology of Chronic Pain  
456 of Predominantly Neuropathic Origin. Results From a General Population Survey. *J. Pain*  
457 **7**, 281–289 (2006).
- 458 10. Hausser, M. Optogenetics: the age of light. *Nat Meth* **11**, 1012–1014 (2014).
- 459 11. Rajasethupathy, P., Ferenczi, E. & Deisseroth, K. Targeting Neural Circuits. *Cell* **165**,  
460 524–534 (2016).
- 461 12. Berndt, A. *et al.* High-efficiency channelrhodopsins for fast neuronal stimulation at low  
462 light levels. *Proc. Natl. Acad. Sci. U. S. A.* **108**, 7595–7600 (2011).
- 463 13. Sassen, M. & Zimmermann, M. Differential blocking of myelinated nerve fibres by  
464 transient depolarization. *Pflügers Arch.* **341**, 179–195 (1973).
- 465 14. Zhu, G., Du, L., Jin, L. & Offenhäusser, A. Effects of Morphology Constraint on  
466 Electrophysiological Properties of Cortical Neurons. *Sci. Rep.* **6**, 23086 (2016).
- 467 15. Bi, A. *et al.* Ectopic Expression of a Microbial-Type Rhodopsin Restores Visual  
468 Responses in Mice with Photoreceptor Degeneration. *Neuron* **50**, 23–33 (2006).
- 469 16. Li, X. *et al.* Fast noninvasive activation and inhibition of neural and network activity by  
470 vertebrate rhodopsin and green algae channelrhodopsin. *Proc. Natl. Acad. Sci. United*  
471 *States Am.* **102**, 17816–17821 (2005).
- 472 17. Jin, L. *et al.* High-efficiency transduction and specific expression of ChR2opt for  
473 optogenetic manipulation of primary cortical neurons mediated by recombinant adeno-  
474 associated viruses. *J. Biotechnol.* **233**, 171–180 (2016).
- 475 18. Peralvarez-Marín, A. & Garriga, P. Optogenetics Comes of Age: Novel Inhibitory Light-  
476 Gated Anionic Channels Allow Efficient Silencing of Neural Function. *ChemBioChem* **17**,  
477 204–206 (2016).
- 478 19. Mohammad, F. *et al.* Optogenetic inhibition of behavior with anion channelrhodopsins.  
479 *Nat Meth advance online publication*, (2017).
- 480 20. Feldbauer, K. *et al.* Channelrhodopsin-2 is a leaky proton pump. *Proc. Natl. Acad. Sci.*  
481 **106**, 12317–12322 (2009).
- 482 21. Nagel, G. *et al.* Channelrhodopsins: directly light-gated cation channels. *Biochem. Soc.*  
483 *Trans.* **33**, 863–6 (2005).
- 484 22. Bendahhou, S. Keeping hyperactive voltage-gated sodium channels in silent mode. *J.*  
485 *Physiol.* **590**, 2543–4 (2012).
- 486 23. Chow, B. Y. *et al.* High-performance genetically targetable optical neural silencing by  
487 light-driven proton pumps. *Nature* **463**, 98–102 (2010).

- 488 24. Wietek, J. *et al.* An improved chloride-conducting channelrhodopsin for light-induced  
489 inhibition of neuronal activity in vivo. *Sci. Rep.* **5**, 14807 (2015).
- 490 25. Wietek, J., Broser, M., Krause, B. S. & Hegemann, P. Identification of a Natural Green  
491 Light Absorbing Chloride Conducting Channelrhodopsin from *Proteomonas sulcata*. *J.*  
492 *Biol. Chem.* **291**, 4121–4127 (2016).
- 493 26. Wietek, J. *et al.* Conversion of channelrhodopsin into a light-gated chloride channel.  
494 *Science* **344**, 409–12 (2014).
- 495 27. Berndt, A., Lee, S. Y., Ramakrishnan, C. & Deisseroth, K. Structure-guided transformation  
496 of channelrhodopsin into a light-activated chloride channel. *Science* **344**, 420–4 (2014).
- 497 28. Faber, E. S. L. & Sah, P. Calcium-Activated Potassium Channels: Multiple Contributions  
498 to Neuronal Function. *Neurosci.* **9**, 181–194 (2003).
- 499 29. Neher, E. & Sakaba, T. Multiple Roles of Calcium Ions in the Regulation of  
500 Neurotransmitter Release. *Neuron* **59**, 861–872 (2008).
- 501 30. Bianchi, D. *et al.* On the mechanisms underlying the depolarization block in the spiking  
502 dynamics of CA1 pyramidal neurons. *J. Comput. Neurosci.* **33**, 207–225 (2012).
- 503 31. Sineshchekov, O. A., Li, H., Govorunova, E. G. & Spudich, J. L. Photochemical reaction  
504 cycle transitions during anion channelrhodopsin gating. 1–8 (2016).  
505 doi:10.1073/pnas.1525269113
- 506 32. Sineshchekov, O. A., Govorunova, E. G., Li, H. & Spudich, J. L. Gating mechanisms of a  
507 natural anion channelrhodopsin. *Proc. Natl. Acad. Sci.* **112**, 14236–14241 (2015).
- 508 33. Wickersham, I. R. & Callaway, E. M. Suitability of hCMV for viral gene expression in the  
509 brain. *Nat Meth* **4**, 379 (2007).
- 510 34. Lange, W. *et al.* Recombinant Adeno-associated virus ( rAAV ) -mediated transduction  
511 and optogenetic manipulation of cortical neurons in vitro. *Proc. SPIE 8928, Opt. Tech.*  
512 *Neurosurgery, Neurophotonics, Optogenetics, 89282S* (2014).  
513 doi:doi:10.1117/12.2038437
- 514 35. Ben-Ari, Y. Excitatory actions of gaba during development: the nature of the nurture. *Nat*  
515 *Rev Neurosci* **3**, 728–739 (2002).
- 516 36. Kaila, K., Price, T. J., Payne, J. A., Puskarjov, M. & Voipio, J. Cation-chloride  
517 cotransporters in neuronal development, plasticity and disease. *Nat Rev Neurosci* **15**,  
518 637–654 (2014).
- 519 37. Jin, L., Zhao, W. & Ma, L. Prokaryotic Expression, Purification, and Production of  
520 Glutathione S-Transferase-tagged Neural Stem Cell Specific Peptides from Phage  
521 Display Screening. *Protein & Peptide Letters* **20**, 165–172 (2013).
- 522 38. Kozak, M. Structural Features in Eukaryotic mRNAs That Modulate the. *J. Biol. Chem.*  
523 **266**, 19867–19870 (1991).
- 524 39. Brewer, G. J., Torricelli, J. R., Evege, E. K. & Price, P. J. Optimized survival of  
525 hippocampal neurons in B27-supplemented neurobasal™, a new serum-free medium  
526 combination. *J. Neurosci. Res.* **35**, 567–576 (1993).

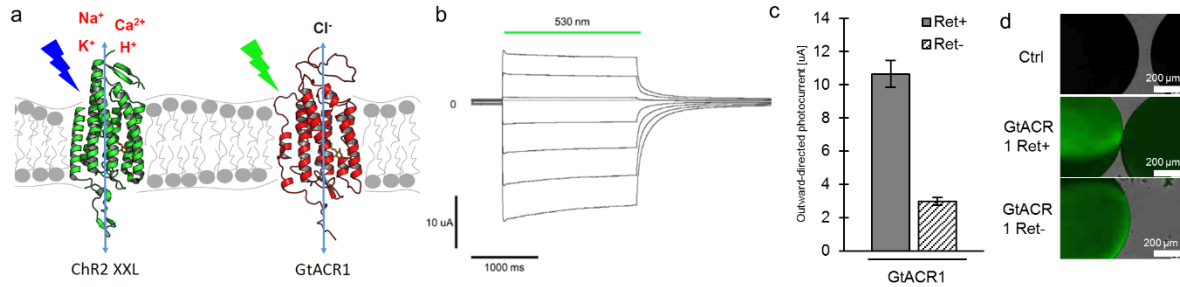

527  
 528 **Figure 1 GtACR1 in *Xenopus laevis* oocytes** A) Schemes displaying the basic functional  
 529 properties of ChR2-XXL (green) and GtACR1 (red). ChR2-XXL relatively unselectively conducts  
 530 protons and cations, such as sodium, after irradiation with blue light (473 nm), whereas GtACR1  
 531 conducts anions, such as chloride, after irradiation with green light (530 nm) under physiological  
 532 conditions. b) Photocurrents generated by a selected GtACR1 expressing *Xenopus laevis* (X.I.)  
 533 oocyte 16 hours after injection of 5 ng cRNA (16 hpi). A saturating 530 nm light pulse (2 s)  
 534 induces current as membrane potential is changed in +20 mV steps from -100 mV to +20 mV. c)  
 535 Mean stationary photocurrent at -100 mV of oocytes (X.I.) expressing GtACR1 (16 hpi) after  
 536 incubation in ND96 solution supplemented with 1  $\mu$ M all-trans retinal (Ret+) or without (Ret-)  
 537 (Ret+  $n=10$ , Ret-  $n=9$ ). d) Observed fluorescence of selected oocytes (X.I.) expressing the  
 538 GtACR1::YFP construct 64 hpi and after incubation in Ret+ or Ret- ND96 (Ret+, Ret-).  
 539 Electrophysiological recordings were done in ORI BaCl<sub>2</sub> solutions pH 7.6. Rhodopsins were  
 540 activated using a laser with corresponding wavelength at saturating intensities (GtACR1 530 nm  
 541 = 18.2 mW/mm<sup>2</sup>). Each statistical evaluation is showing an individual paired experiment. Error  
 542 bars indicate s.d.

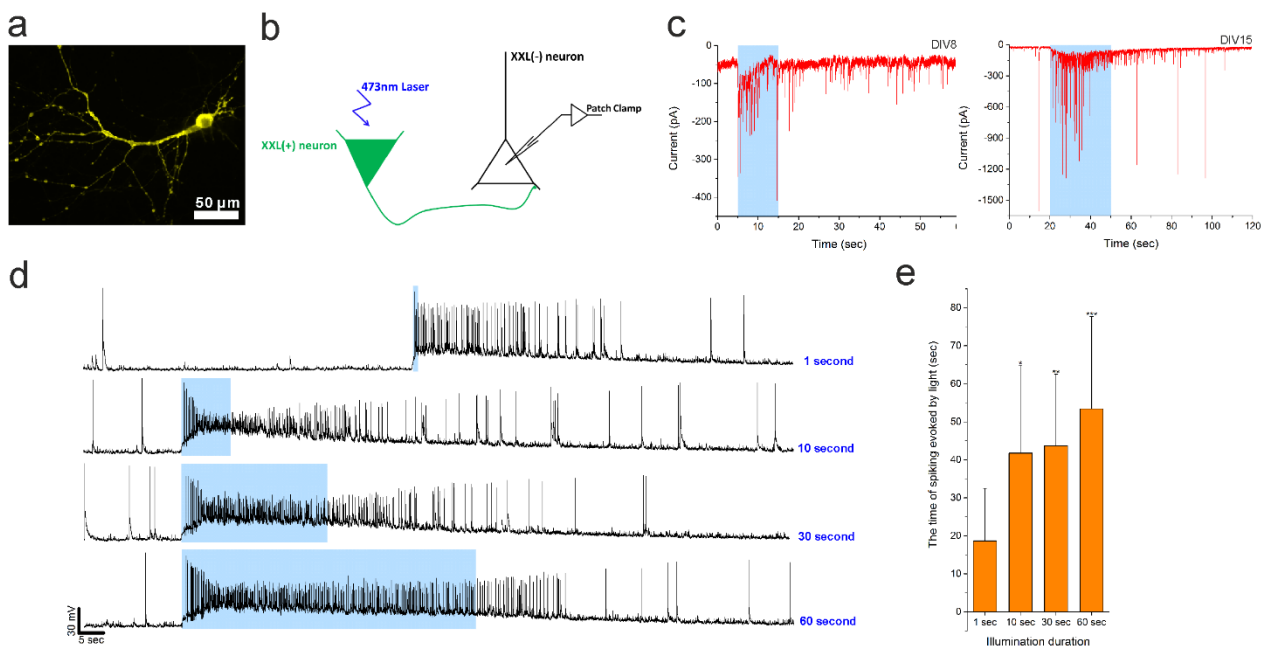

543

544 **Figure 2 Neurotransmission induced with ChR2-XXL**

545 a) Expression of ChR2-XXL-YFP in a primary rat cortical neuron on DIV13. b) Schematic of a  
546 neurotransmission measurement. Patch clamp was employed to measure the response of the  
547 ChR2-XXL negative neuron (the putative postsynaptic neuron) when the 473 nm laser  
548 illuminated the putative presynaptic neuron that expressed ChR2-XXL. ChR2-XXL positive  
549 neurons were identified by their fluorescence when selecting neuron pairs. c) Current traces  
550 show peak currents of ChR2-XXL negative neurons during laser stimulation at ChR2-XXL  
551 positive neurons (Holding potential: -70 mV). Blue bands indicate the period of laser stimulation.  
552 d) Spiking associated with neurotransmission from the putative presynaptic neuron under  
553 different durations of laser illumination. All traces were measured from the same neuron.  
554 Injected holding current was -27 pA (laser illumination 1 second) or -19 pA for others. e) The  
555 time of spiking evoked by the laser light of different durations ( $n = 11, 9, 15$  and  $8$  cells for 1 sec,  
556 10 sec, 30 sec, and 60 sec, respectively; one-way ANOVA, \*  $p = 0.0127255$ , \*\*  $p = 0.00107$ , \*\*\*  
557  $p = 0.000987$  vs. 1 sec group).

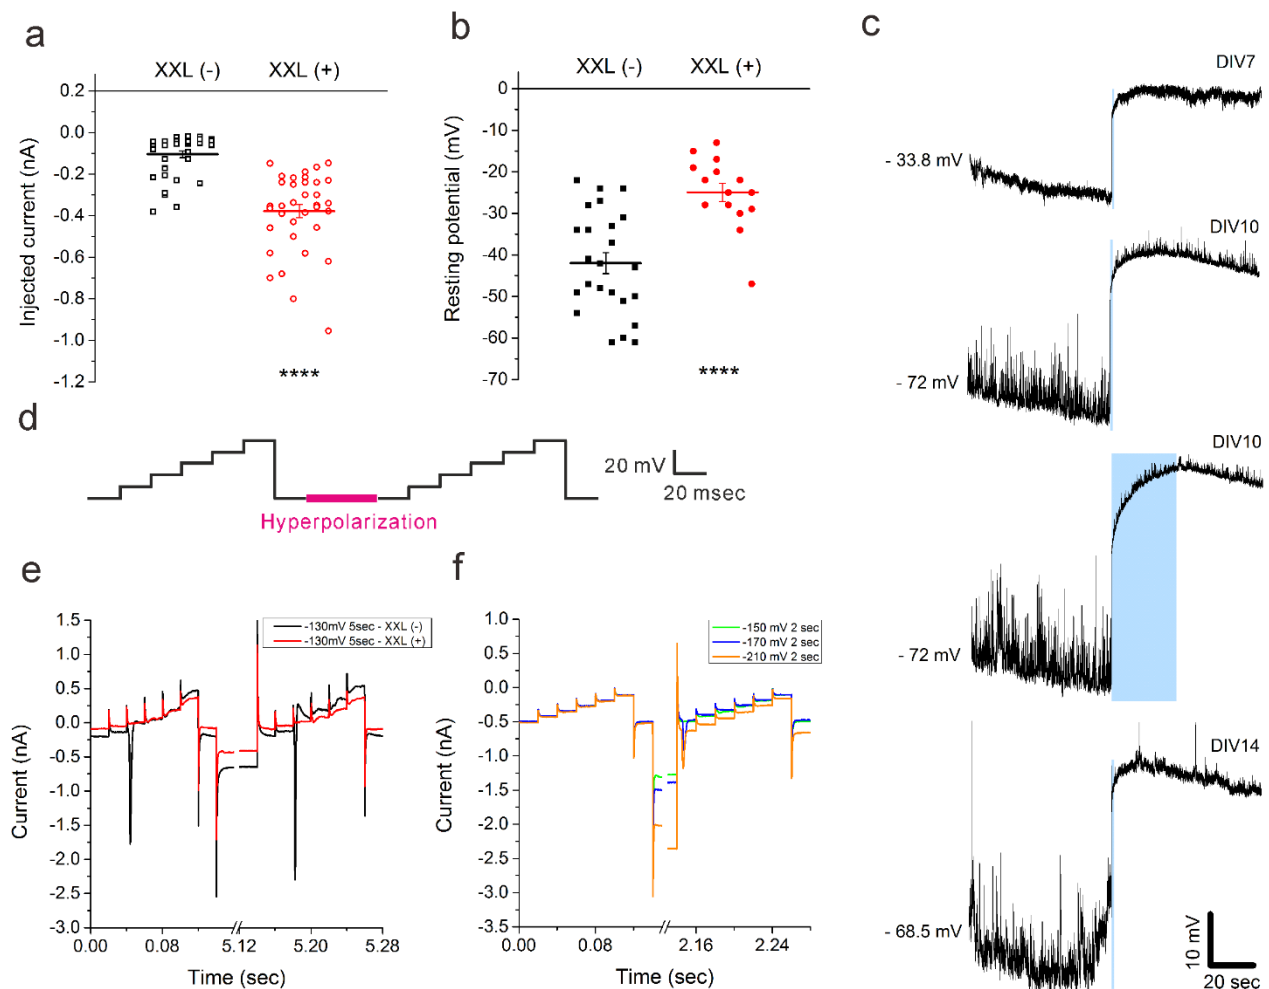

559 **Figure 3 Depolarisation block induced by ChR2-XXL**

560 a) After 10 minutes exposure to white light, ChR2-XXL positive neurons (red unfilled circles)  
561 needed more injected current than control neurons (ChR2-XXL negative neurons, black unfilled  
562 circles) to hold the membrane potential at -70 mV (DIV7 to DIV17). b) The resting potential (0  
563 pA injection) of ChR2-XXL positive neurons (red filled circles) was higher than control cells  
564 (ChR2-XXL negative neurons, black filled circles) on DIV7 and DIV14. In both a) and b), each  
565 circle is the average value over 1 second for one neuron (t-Test, \*\*\*\*: a)  $p = 5.5233E-06$ , b)  $p =$   
566  $2.72385E-10$ ). c) No action potentials of ChR2-XXL(+) neurons are induced by laser light when  
567 directly targeted. Membrane potentials were measured with current clamp at DIV7 (laser  
568 stimulation 1 sec, injected current: -16 pA), DIV10 (laser stimulation 1 sec, injected current: -190  
569 pA; laser stimulation 30 secs, injected current: -170 pA), DIV14 (laser stimulation 1 sec, injected  
570 current: -173 pA). d) Schematic of hyperpolarisation protocol to recover from depolarisation  
571 block. Voltage steps from -70 mV to -20 mV in 10 mV increments were applied before and after  
572 hyperpolarisation. Hyperpolarisation with different voltages and durations is indicated by the pink  
573 region e) Recovery of ChR2-XXL positive neurons was not achieved by hyperpolarisation to -  
574 130 mV for 5 secs. A typical current trace of ChR2-XXL positive neurons is shown in red, while  
575 that of a non-transfected neuron is shown in black. F) Recovery of ChR2-XXL positive neurons  
576 was successfully achieved by hyperpolarisation at the severe conditions of -170 mV for 2 secs  
577 (Blue) and -210 mV for 2 secs (Orange). These traces are from a different neurons than **Fig. 2e**.

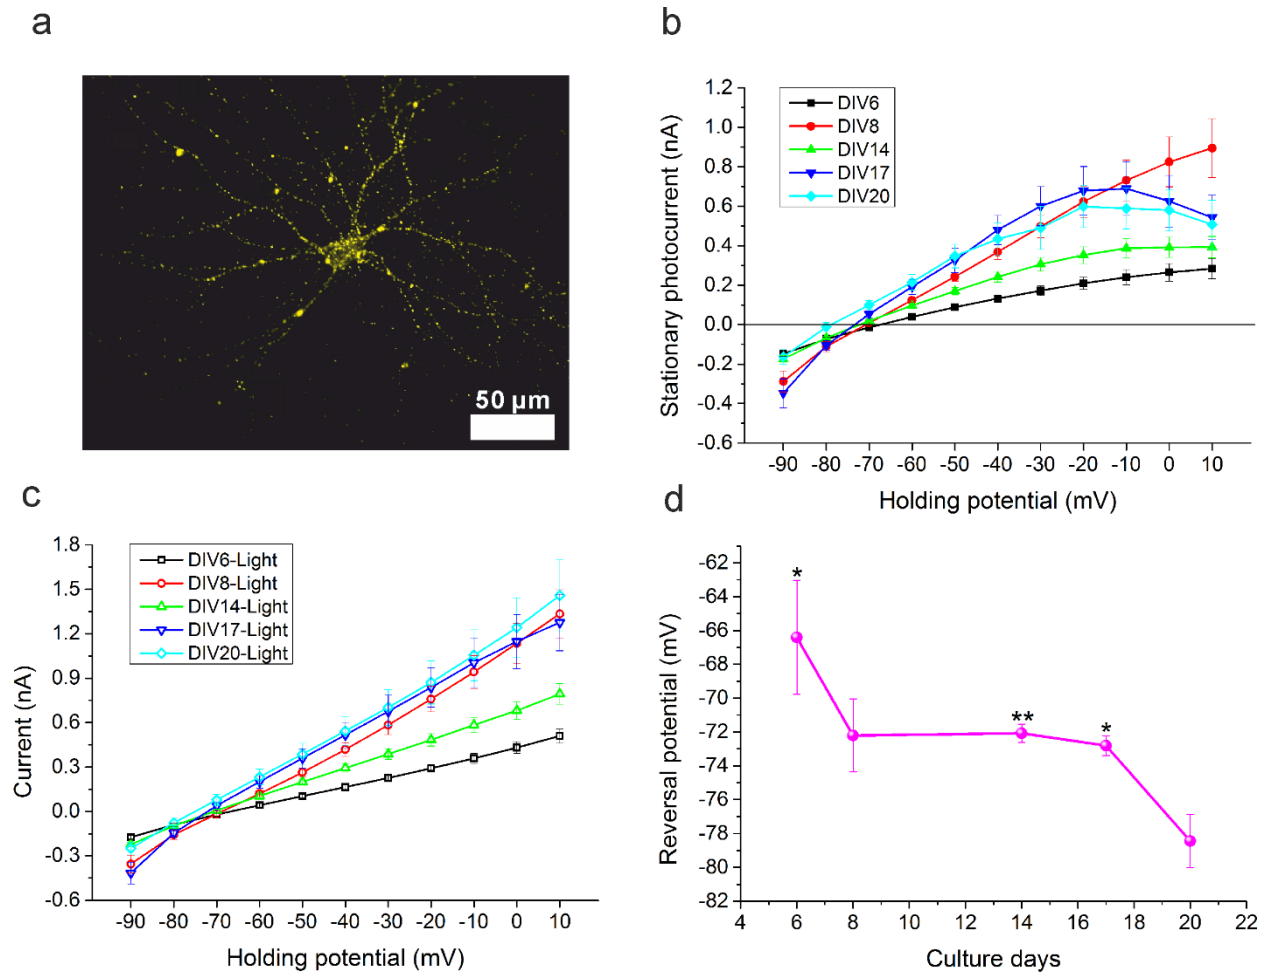

578

#### 579 **Figure 4 IE relationship for GtACR1 in primary rat cortical neurons**

580 a) Yellow fluorescence is shown in a typical rat cortical neuron (DIV16) transfected with  
581 GtACR1-YFP. b) IE relationship for GtACR1 in primary rat cortical neurons at different days. The  
582 data (mean values  $\pm$  s.e.m.;  $n = 3$  to 5 neurons) were baseline corrected by subtracting the  
583 current from the last 50 milliseconds without light from the current of the last 50 milliseconds with  
584 light. c) The current of GtACR1-expressing neurons clamped at different voltages from -90 mV to  
585 10 mV and exposed to blue light. The data indicates mean values of the last 50 milliseconds  $\pm$   
586 s.e.m. ( $n = 3$  to 5 neurons). d) Reversal potential for GtACR1 during neural development. The  
587 reversal potential was defined as the point where the stationary photocurrent amplitude was 0  
588 pA. At different days *in vitro*, the reversal potentials of GtACR1 (Mean values  $\pm$  s.e.m.;  $n = 3$  to 5  
589 cells) were determined by linear fits of the IE relationship curves as depicted in **Fig. 4b**. Data  
590 were analysed by one-way ANOVA (\*  $p = 0.017878$  DIV6 vs. DIV20 group,  $p = 0.032382$  DIV17  
591 vs. DIV20 group, \*\*  $p = 0.00858$  DIV14 vs. DIV20 group).



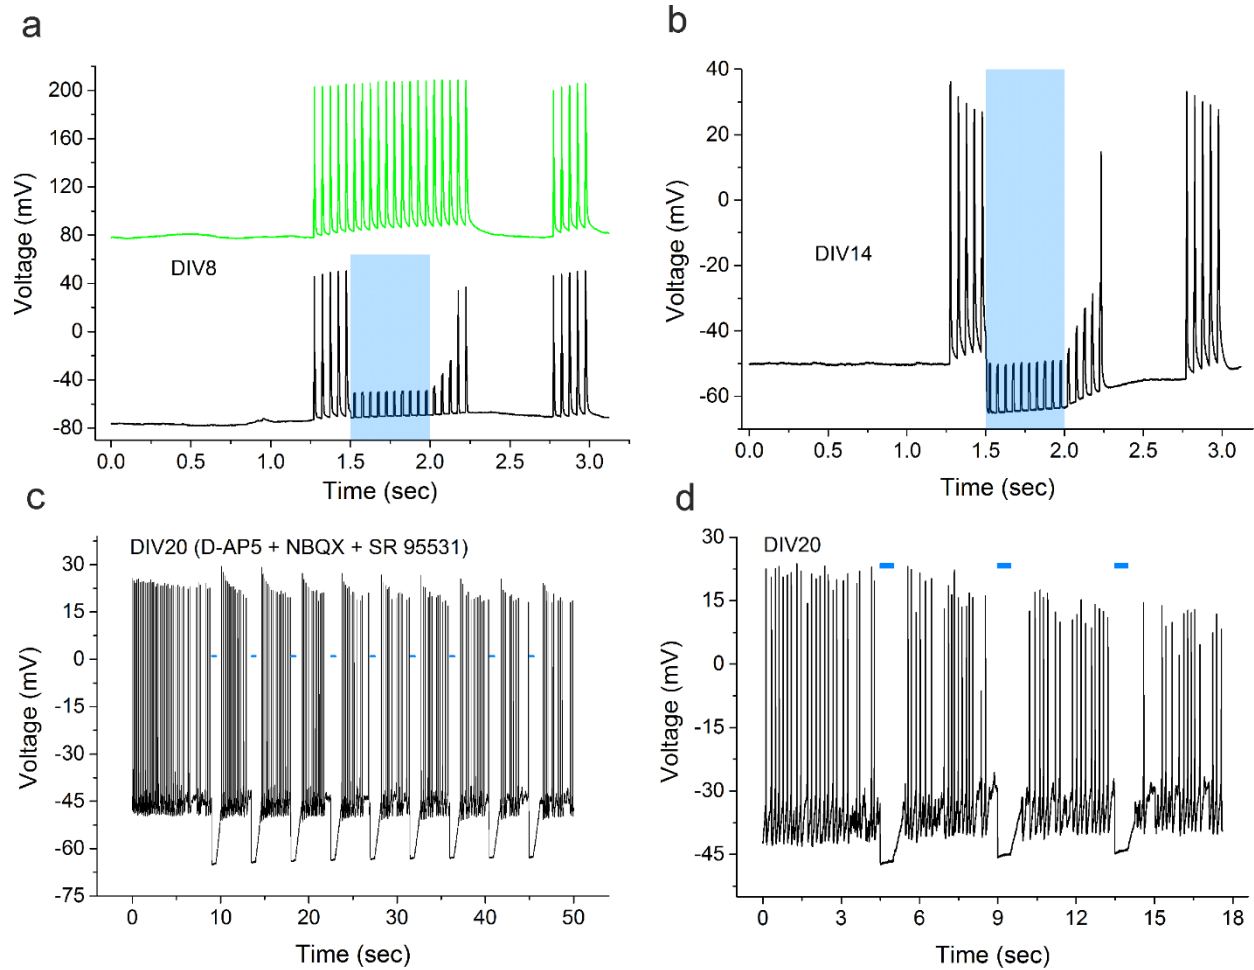

592

593 **Figure 5 Photoinhibition of primary rat cortical neural activity at different culture days**

594 a) Photoinhibition of spiking induced by pulsed current (300 pA for 10 milliseconds in one pulse,  
595 20 Hz) in a typical GtACR1-expressing neuron of DIV8. Green trace indicates the  
596 measurement without light (top), black trace (bottom) indicates the measurement with light for  
597 500 msec (blue box). b) Photoinhibition of spiking induced by pulsed current (300 pA for 10  
598 milliseconds in one pulse, 20 Hz) in a typical GtACR1-expressing neuron at DIV14. c) The  
599 amplitude of action potentials increased after photoinhibition. In a typical neuron (DIV20)  
600 expressing GtACR1, a continuous current of 100 pA was clamped near threshold so it  
601 continually fired APs. Synaptic blockers were used in the bath. Nine blue laser pulses were  
602 applied for inhibiting neural activity, each pulse lasted for 500 milliseconds separated by a delay  
603 time of 4 seconds and showed higher amplitude APs when the firing resumed in the dark. d)  
604 Photoinhibition of spontaneous activity in a GtACR1-expressing neuron at DIV20 without any  
605 current injection or synaptic blockers. Each pulse of blue laser lasts 500 msec (blue bar). In all  
606 measurements, blue laser intensity was 0.21 W/mm<sup>2</sup>.
